# Supplementary material
Source: publisher figshare collection journal article supplement (https://acs.figshare.com/ndownloader/files/11274812)
Supplement: Supplementary file 1 [file 11274812]

 
data_o+pn12
 
_audit_creation_method            SHELXL-97
_chemical_name_systematic
;
 ?
;
_chemical_name_common             ?
_chemical_melting_point           ?
_chemical_formula_moiety          ?
_chemical_formula_sum
 'C31 H27 Cl2 N3 O3 S'
_chemical_formula_weight          592.52
 
loop_
 _atom_type_symbol
 _atom_type_description
 _atom_type_scat_dispersion_real
 _atom_type_scat_dispersion_imag
 _atom_type_scat_source
 'C'  'C'   0.0033   0.0016
 'International Tables Vol C Tables 4.2.6.8 and 6.1.1.4'
 'H'  'H'   0.0000   0.0000
 'International Tables Vol C Tables 4.2.6.8 and 6.1.1.4'
 'N'  'N'   0.0061   0.0033
 'International Tables Vol C Tables 4.2.6.8 and 6.1.1.4'
 'O'  'O'   0.0106   0.0060
 'International Tables Vol C Tables 4.2.6.8 and 6.1.1.4'
 'Cl'  'Cl'   0.1484   0.1585
 'International Tables Vol C Tables 4.2.6.8 and 6.1.1.4'
 'S'  'S'   0.1246   0.1234
 'International Tables Vol C Tables 4.2.6.8 and 6.1.1.4'
 
_symmetry_cell_setting            'Orthorhombic'
_symmetry_space_group_name_H-M    'Pna2(1) '
 
loop_
 _symmetry_equiv_pos_as_xyz
 'x, y, z'
 '-x, -y, z+1/2'
 '-x+1/2, y+1/2, z+1/2'
 'x+1/2, -y+1/2, z'
 
_cell_length_a                    29.879(6)
_cell_length_b                    10.897(2)
_cell_length_c                    9.1788(18)
_cell_angle_alpha                 90.00
_cell_angle_beta                  90.00
_cell_angle_gamma                 90.00
_cell_volume                      2988.5(10)
_cell_formula_units_Z             4
_cell_measurement_temperature     298(2)
_cell_measurement_reflns_used     15729
_cell_measurement_theta_min       2.7
_cell_measurement_theta_max       29.1
 
_exptl_crystal_description        flat
_exptl_crystal_colour             colorless
_exptl_crystal_size_max           0.22
_exptl_crystal_size_mid           0.20
_exptl_crystal_size_min           0.10
_exptl_crystal_density_meas       ?
_exptl_crystal_density_diffrn     1.317
_exptl_crystal_density_method     'not measured'
_exptl_crystal_F_000              1232
_exptl_absorpt_coefficient_mu     0.324
_exptl_absorpt_correction_type    Numerical
_exptl_absorpt_correction_T_min   0.7354
_exptl_absorpt_correction_T_max   0.8571
_exptl_absorpt_process_details    
'(X-SHAPE and X-RED; Stoe & Cie, 2005)'
 
_exptl_special_details
;
 ?
;
 
_diffrn_ambient_temperature       298(2)
_diffrn_radiation_wavelength      0.71073
_diffrn_radiation_type            MoK\a
_diffrn_radiation_source          'fine-focus sealed tube'
_diffrn_radiation_monochromator   graphite
_diffrn_measurement_device_type   'Stoe IPDS-II'
_diffrn_measurement_method        'rotation method'
_diffrn_detector_area_resol_mean  ?
_diffrn_standards_number          ?
_diffrn_standards_interval_count  ?
_diffrn_standards_interval_time   ?
_diffrn_standards_decay_%         ?
_diffrn_reflns_number             9566
_diffrn_reflns_av_R_equivalents   0.0490
_diffrn_reflns_av_sigmaI/netI     0.1305
_diffrn_reflns_limit_h_min        -35
_diffrn_reflns_limit_h_max        35
_diffrn_reflns_limit_k_min        -12
_diffrn_reflns_limit_k_max        11
_diffrn_reflns_limit_l_min        -10
_diffrn_reflns_limit_l_max        10
_diffrn_reflns_theta_min          2.77
_diffrn_reflns_theta_max          25.00
_reflns_number_total              4944
_reflns_number_gt                 2347
_reflns_threshold_expression      >2\s(I)
 
_computing_data_collection     'X-AREA (Stoe & Cie, 2005)'
_computing_cell_refinement     'X-AREA (Stoe & Cie, 2005)'
_computing_data_reduction     'X-AREA (Stoe & Cie, 2005)'
_computing_structure_solution     'SHELXTL (Sheldrick, 2008)'
_computing_structure_refinement     'SHELXTL (Sheldrick, 2008)'
_computing_molecular_graphics     'ORTEP-3 (Farrugia, 1997)'
_computing_publication_material     'WinGX (Farrugia, 1999)'
 
_refine_special_details
;
 Refinement of F^2^ against ALL reflections.  The weighted R-factor wR and
 goodness of fit S are based on F^2^, conventional R-factors R are based
 on F, with F set to zero for negative F^2^. The threshold expression of
 F^2^ > 2\s(F^2^) is used only for calculating R-factors(gt) etc. and is
 not relevant to the choice of reflections for refinement.  R-factors based
 on F^2^ are statistically about twice as large as those based on F, and R-
 factors based on ALL data will be even larger.
;
 
_refine_ls_structure_factor_coef  Fsqd
_refine_ls_matrix_type            full
_refine_ls_weighting_scheme       calc
_refine_ls_weighting_details
 'calc w=1/[\s^2^(Fo^2^)+(0.0241P)^2^+0.0000P] where P=(Fo^2^+2Fc^2^)/3'
_atom_sites_solution_primary      direct
_atom_sites_solution_secondary    difmap
_atom_sites_solution_hydrogens    geom
_refine_ls_hydrogen_treatment     constr
_refine_ls_extinction_method      none
_refine_ls_extinction_coef        ?
_refine_ls_abs_structure_details
 'Flack H D (1983), Acta Cryst. A39, 876-881'
_refine_ls_abs_structure_Flack    0.11(6)
_refine_ls_number_reflns          4944
_refine_ls_number_parameters      371
_refine_ls_number_restraints      1
_refine_ls_R_factor_all           0.0945
_refine_ls_R_factor_gt            0.0348
_refine_ls_wR_factor_ref          0.0686
_refine_ls_wR_factor_gt           0.0580
_refine_ls_goodness_of_fit_ref    0.631
_refine_ls_restrained_S_all       0.631
_refine_ls_shift/su_max           0.001
_refine_ls_shift/su_mean          0.000
 
loop_
 _atom_site_label
 _atom_site_type_symbol
 _atom_site_fract_x
 _atom_site_fract_y
 _atom_site_fract_z
 _atom_site_U_iso_or_equiv
 _atom_site_adp_type
 _atom_site_occupancy
 _atom_site_symmetry_multiplicity
 _atom_site_calc_flag
 _atom_site_refinement_flags
 _atom_site_disorder_assembly
 _atom_site_disorder_group
S1 S 0.71560(15) 0.2872(5) 0.3222(5) 0.0688(19) Uani 0.308(5) 1 d P A 1
S1' S 0.71040(7) 0.1967(2) 0.3829(2) 0.0775(9) Uani 0.692(5) 1 d P A 2
Cl1 Cl 0.47238(5) 1.55814(10) 0.81124(17) 0.1032(5) Uani 1 1 d . . .
Cl2 Cl 0.37446(6) 0.37807(11) 0.15180(17) 0.1167(6) Uani 1 1 d . . .
N1 N 0.32583(9) 0.9004(2) 0.4545(3) 0.0411(7) Uani 1 1 d . . .
H1 H 0.3152 0.8752 0.5363 0.049 Uiso 1 1 calc R . .
N3 N 0.42720(9) 1.0781(2) 0.5442(3) 0.0365(7) Uani 1 1 d . . .
N2 N 0.44935(8) 0.8684(2) 0.5186(3) 0.0379(7) Uani 1 1 d . . .
C6 C 0.53776(11) 0.9346(3) 0.6031(4) 0.0409(9) Uani 1 1 d . . .
H6 H 0.5267 0.8684 0.6562 0.049 Uiso 1 1 calc R . .
C5 C 0.50788(10) 1.0143(3) 0.5327(4) 0.0325(8) Uani 1 1 d . . .
C11 C 0.43970(11) 1.1951(3) 0.6088(4) 0.0360(8) Uani 1 1 d . . .
C4 C 0.45929(10) 0.9803(3) 0.5344(4) 0.0313(8) Uani 1 1 d . . .
C2 C 0.37261(10) 0.9330(3) 0.4452(4) 0.0379(8) Uani 1 1 d . . .
H2 H 0.3803 0.9374 0.3416 0.046 Uiso 1 1 calc R . .
C3 C 0.40240(11) 0.8322(3) 0.5147(4) 0.0388(9) Uani 1 1 d . . .
H3 H 0.3922 0.8180 0.6147 0.047 Uiso 1 1 calc R . .
C10 C 0.52477(11) 1.1113(3) 0.4550(4) 0.0390(9) Uani 1 1 d . . .
H10 H 0.5053 1.1657 0.4093 0.047 Uiso 1 1 calc R . .
C24 C 0.39688(12) 0.7146(3) 0.4290(4) 0.0409(9) Uani 1 1 d . . .
C9 C 0.57078(13) 1.1292(3) 0.4437(4) 0.0519(10) Uani 1 1 d . . .
H9 H 0.5819 1.1943 0.3890 0.062 Uiso 1 1 calc R . .
C18 C 0.25386(12) 0.8480(3) 0.3516(4) 0.0423(10) Uani 1 1 d . . .
O2 O 0.31007(8) 0.9584(3) 0.2246(3) 0.0647(8) Uani 1 1 d . . .
C19 C 0.21883(14) 0.8896(3) 0.2647(5) 0.0626(12) Uani 1 1 d . . .
H19 H 0.2232 0.9565 0.2034 0.075 Uiso 1 1 calc R . .
C17 C 0.29832(12) 0.9085(3) 0.3373(5) 0.0454(10) Uani 1 1 d . . .
C27 C 0.38297(16) 0.5084(4) 0.2605(6) 0.0652(13) Uani 1 1 d . . .
C12 C 0.45238(12) 1.1994(3) 0.7517(4) 0.0463(10) Uani 1 1 d . . .
H12 H 0.4538 1.1275 0.8062 0.056 Uiso 1 1 calc R . .
C16 C 0.43528(11) 1.3009(3) 0.5271(4) 0.0474(9) Uani 1 1 d . . .
H16 H 0.4248 1.2977 0.4318 0.057 Uiso 1 1 calc R . .
C7 C 0.58306(12) 0.9533(3) 0.5945(4) 0.0486(10) Uani 1 1 d . . .
H7 H 0.6026 0.9008 0.6428 0.058 Uiso 1 1 calc R . .
C13 C 0.46326(13) 1.3117(4) 0.8161(5) 0.0581(11) Uani 1 1 d . . .
H13 H 0.4729 1.3157 0.9123 0.070 Uiso 1 1 calc R . .
C14 C 0.45940(13) 1.4161(4) 0.7332(5) 0.0579(12) Uani 1 1 d . . .
C21 C 0.17075(15) 0.7331(5) 0.3555(6) 0.0749(14) Uani 1 1 d . . .
H21 H 0.1432 0.6935 0.3556 0.090 Uiso 1 1 calc R . .
C20 C 0.17706(13) 0.8316(5) 0.2688(5) 0.0704(14) Uani 1 1 d . . .
H20 H 0.1537 0.8610 0.2118 0.084 Uiso 1 1 calc R . .
C29 C 0.41977(13) 0.6974(3) 0.3004(5) 0.0546(10) Uani 1 1 d . . .
H29 H 0.4400 0.7570 0.2703 0.065 Uiso 1 1 calc R . .
C28 C 0.41366(15) 0.5948(4) 0.2148(5) 0.0646(13) Uani 1 1 d . . .
H28 H 0.4297 0.5842 0.1289 0.078 Uiso 1 1 calc R . .
C15 C 0.44699(13) 1.4129(3) 0.5910(5) 0.0546(11) Uani 1 1 d . . .
H15 H 0.4463 1.4848 0.5364 0.065 Uiso 1 1 calc R . .
C26 C 0.35953(15) 0.5204(4) 0.3853(6) 0.0687(14) Uani 1 1 d . . .
H26 H 0.3392 0.4603 0.4135 0.082 Uiso 1 1 calc R . .
C25 C 0.36625(12) 0.6252(3) 0.4724(4) 0.0512(11) Uani 1 1 d . . .
H25 H 0.3503 0.6348 0.5586 0.061 Uiso 1 1 calc R . .
C8 C 0.59985(12) 1.0509(4) 0.5134(5) 0.0574(11) Uani 1 1 d . . .
H8 H 0.6306 1.0631 0.5063 0.069 Uiso 1 1 calc R . .
C23 C 0.24570(13) 0.7495(4) 0.4421(5) 0.0597(11) Uani 1 1 d . . .
H23 H 0.2683 0.7220 0.5035 0.072 Uiso 1 1 calc R . .
C1 C 0.38238(12) 1.0580(3) 0.5110(4) 0.0429(9) Uani 1 1 d . . .
C22 C 0.20466(14) 0.6905(4) 0.4437(5) 0.0719(13) Uani 1 1 d . . .
H22 H 0.2000 0.6229 0.5037 0.086 Uiso 1 1 calc R . .
O1 O 0.35455(8) 1.1360(2) 0.5281(4) 0.0658(8) Uani 1 1 d . . .
O3 O 0.68420(10) 0.2141(3) 0.2480(3) 0.0921(10) Uani 1 1 d . . .
C31 C 0.6957(2) 0.3162(5) 0.5042(5) 0.126(2) Uani 1 1 d . . .
H31A H 0.7170 0.3660 0.5553 0.189 Uiso 0.308(5) 1 calc PR A 1
H31B H 0.6920 0.2397 0.5546 0.189 Uiso 0.308(5) 1 calc PR A 1
H31C H 0.6675 0.3582 0.4996 0.189 Uiso 0.308(5) 1 calc PR A 1
H31D H 0.7123 0.3073 0.5932 0.189 Uiso 0.692(5) 1 calc PR A 2
H31E H 0.6642 0.3122 0.5247 0.189 Uiso 0.692(5) 1 calc PR A 2
H31F H 0.7026 0.3939 0.4605 0.189 Uiso 0.692(5) 1 calc PR A 2
C30 C 0.76520(18) 0.2352(7) 0.3548(9) 0.185(3) Uani 1 1 d . . .
H30A H 0.7822 0.2962 0.4059 0.278 Uiso 0.308(5) 1 calc PR A 1
H30B H 0.7798 0.2159 0.2644 0.278 Uiso 0.308(5) 1 calc PR A 1
H30C H 0.7631 0.1624 0.4134 0.278 Uiso 0.308(5) 1 calc PR A 1
H30D H 0.7818 0.2234 0.4433 0.278 Uiso 0.692(5) 1 calc PR A 2
H30E H 0.7671 0.3196 0.3256 0.278 Uiso 0.692(5) 1 calc PR A 2
H30F H 0.7775 0.1840 0.2796 0.278 Uiso 0.692(5) 1 calc PR A 2
 
loop_
 _atom_site_aniso_label
 _atom_site_aniso_U_11
 _atom_site_aniso_U_22
 _atom_site_aniso_U_33
 _atom_site_aniso_U_23
 _atom_site_aniso_U_13
 _atom_site_aniso_U_12
S1 0.087(3) 0.056(3) 0.064(3) 0.013(3) 0.004(2) -0.007(2)
S1' 0.0906(14) 0.0747(18) 0.0673(14) 0.0035(13) 0.0014(12) -0.0163(12)
Cl1 0.1200(11) 0.0549(6) 0.1347(12) -0.0418(8) -0.0210(11) -0.0096(8)
Cl2 0.1660(15) 0.0680(8) 0.1162(12) -0.0437(8) -0.0324(12) -0.0180(9)
N1 0.0284(15) 0.0571(19) 0.0377(18) 0.0036(16) 0.0004(15) -0.0061(14)
N3 0.0293(16) 0.0352(16) 0.0449(19) -0.0074(14) 0.0007(15) 0.0004(13)
N2 0.0290(15) 0.0338(15) 0.051(2) -0.0028(16) 0.0005(15) 0.0026(13)
C6 0.041(2) 0.0400(19) 0.041(2) -0.0012(18) 0.0045(17) -0.0020(18)
C5 0.0285(18) 0.0357(18) 0.033(2) -0.0085(18) -0.0067(18) 0.0011(16)
C11 0.033(2) 0.034(2) 0.041(2) -0.0060(19) -0.0048(18) 0.0013(17)
C4 0.0296(18) 0.0380(19) 0.026(2) 0.0013(17) 0.0043(17) 0.0040(16)
C2 0.0321(19) 0.041(2) 0.041(2) -0.0022(18) -0.0003(18) -0.0012(17)
C3 0.0359(19) 0.034(2) 0.047(2) -0.0017(18) -0.0058(19) -0.0017(16)
C10 0.035(2) 0.040(2) 0.042(2) 0.0014(18) -0.0031(19) 0.0032(16)
C24 0.038(2) 0.037(2) 0.048(3) -0.0004(19) -0.005(2) 0.0009(17)
C9 0.048(2) 0.046(2) 0.061(3) -0.003(2) 0.004(2) -0.0077(19)
C18 0.036(2) 0.049(2) 0.043(3) -0.0101(19) -0.0096(19) 0.0044(18)
O2 0.0461(18) 0.096(2) 0.0518(19) 0.0164(16) -0.0072(15) -0.0091(15)
C19 0.059(3) 0.067(3) 0.061(3) -0.011(2) -0.007(2) -0.005(2)
C17 0.038(2) 0.047(2) 0.051(3) -0.005(2) 0.004(2) 0.0058(18)
C27 0.081(3) 0.046(3) 0.069(4) -0.016(3) -0.031(3) -0.001(3)
C12 0.049(2) 0.043(2) 0.047(3) -0.001(2) -0.008(2) 0.0036(19)
C16 0.056(2) 0.041(2) 0.045(2) 0.003(2) -0.007(2) 0.0047(19)
C7 0.034(2) 0.056(2) 0.056(3) -0.004(2) -0.0153(19) 0.0109(19)
C13 0.063(3) 0.059(3) 0.052(3) -0.016(3) -0.009(2) -0.001(2)
C14 0.054(3) 0.040(2) 0.079(3) -0.016(2) -0.009(2) 0.001(2)
C21 0.059(3) 0.095(4) 0.071(4) -0.012(3) -0.009(3) -0.031(3)
C20 0.035(2) 0.109(4) 0.067(4) -0.008(3) -0.021(2) -0.007(3)
C29 0.057(3) 0.045(2) 0.062(3) -0.005(2) 0.002(2) -0.005(2)
C28 0.090(4) 0.057(3) 0.048(3) -0.011(2) -0.013(3) 0.003(3)
C15 0.060(3) 0.038(2) 0.066(3) 0.003(2) -0.005(2) 0.004(2)
C26 0.069(3) 0.048(3) 0.090(4) 0.000(3) -0.025(3) -0.023(2)
C25 0.046(2) 0.044(2) 0.064(3) -0.001(2) 0.001(2) -0.0100(19)
C8 0.030(2) 0.066(3) 0.077(3) -0.023(3) -0.008(2) -0.005(2)
C23 0.043(2) 0.069(3) 0.066(3) 0.002(2) -0.012(2) -0.010(2)
C1 0.041(2) 0.042(2) 0.046(2) -0.003(2) -0.011(2) 0.0034(18)
C22 0.057(3) 0.087(3) 0.072(3) 0.000(3) -0.001(3) -0.026(3)
O1 0.0332(14) 0.0585(15) 0.106(2) -0.0299(18) -0.0004(16) 0.0139(13)
O3 0.062(2) 0.153(3) 0.062(2) -0.018(2) -0.0162(18) -0.004(2)
C31 0.162(6) 0.125(4) 0.092(5) -0.022(4) -0.007(5) -0.003(4)
C30 0.090(5) 0.303(10) 0.163(8) -0.022(6) -0.062(6) 0.013(5)
 
_geom_special_details
;
 All s.u.'s (except the s.u. in the dihedral angle between two l.s. planes)
 are estimated using the full covariance matrix.  The cell s.u.'s are taken
 into account individually in the estimation of s.u.'s in distances, angles
 and torsion angles; correlations between s.u.'s in cell parameters are only
 used when they are defined by crystal symmetry.  An approximate (isotropic)
 treatment of cell s.u.'s is used for estimating s.u.'s involving l.s. planes.
;
 
loop_
 _geom_bond_atom_site_label_1
 _geom_bond_atom_site_label_2
 _geom_bond_distance
 _geom_bond_site_symmetry_2
 _geom_bond_publ_flag
S1 O3 1.407(5) . ?
S1 C30 1.615(7) . ?
S1 C31 1.801(6) . ?
S1' O3 1.477(3) . ?
S1' C30 1.710(6) . ?
S1' C31 1.768(5) . ?
Cl1 C14 1.749(4) . ?
Cl2 C27 1.754(4) . ?
N1 C17 1.357(4) . ?
N1 C2 1.445(4) . ?
N1 H1 0.8600 . ?
N3 C1 1.391(4) . ?
N3 C4 1.436(4) . ?
N3 C11 1.455(4) . ?
N2 C4 1.264(3) . ?
N2 C3 1.457(4) . ?
C6 C7 1.371(4) . ?
C6 C5 1.403(4) . ?
C6 H6 0.9300 . ?
C5 C10 1.372(4) . ?
C5 C4 1.498(4) . ?
C11 C12 1.366(4) . ?
C11 C16 1.381(4) . ?
C2 C1 1.518(4) . ?
C2 C3 1.551(4) . ?
C2 H2 0.9800 . ?
C3 C24 1.513(4) . ?
C3 H3 0.9800 . ?
C10 C9 1.392(5) . ?
C10 H10 0.9300 . ?
C24 C29 1.377(5) . ?
C24 C25 1.394(5) . ?
C9 C8 1.375(5) . ?
C9 H9 0.9300 . ?
C18 C23 1.379(5) . ?
C18 C19 1.392(5) . ?
C18 C17 1.489(5) . ?
O2 C17 1.220(4) . ?
C19 C20 1.400(5) . ?
C19 H19 0.9300 . ?
C27 C26 1.349(6) . ?
C27 C28 1.380(6) . ?
C12 C13 1.398(5) . ?
C12 H12 0.9300 . ?
C16 C15 1.399(4) . ?
C16 H16 0.9300 . ?
C7 C8 1.392(5) . ?
C7 H7 0.9300 . ?
C13 C14 1.373(5) . ?
C13 H13 0.9300 . ?
C14 C15 1.357(5) . ?
C21 C20 1.349(6) . ?
C21 C22 1.378(6) . ?
C21 H21 0.9300 . ?
C20 H20 0.9300 . ?
C29 C28 1.379(5) . ?
C29 H29 0.9300 . ?
C28 H28 0.9300 . ?
C15 H15 0.9300 . ?
C26 C25 1.408(5) . ?
C26 H26 0.9300 . ?
C25 H25 0.9300 . ?
C8 H8 0.9300 . ?
C23 C22 1.384(5) . ?
C23 H23 0.9300 . ?
C1 O1 1.200(4) . ?
C22 H22 0.9300 . ?
C31 H31A 0.9600 . ?
C31 H31B 0.9600 . ?
C31 H31C 0.9600 . ?
C31 H31D 0.9600 . ?
C31 H31E 0.9600 . ?
C31 H31F 0.9600 . ?
C30 H30A 0.9600 . ?
C30 H30B 0.9600 . ?
C30 H30C 0.9600 . ?
C30 H30D 0.9600 . ?
C30 H30E 0.9600 . ?
C30 H30F 0.9600 . ?
 
loop_
 _geom_angle_atom_site_label_1
 _geom_angle_atom_site_label_2
 _geom_angle_atom_site_label_3
 _geom_angle
 _geom_angle_site_symmetry_1
 _geom_angle_site_symmetry_3
 _geom_angle_publ_flag
O3 S1 C30 120.2(4) . . ?
O3 S1 C31 109.2(4) . . ?
C30 S1 C31 101.1(4) . . ?
O3 S1' C30 110.5(3) . . ?
O3 S1' C31 107.6(3) . . ?
C30 S1' C31 98.8(3) . . ?
C17 N1 C2 121.5(3) . . ?
C17 N1 H1 119.2 . . ?
C2 N1 H1 119.2 . . ?
C1 N3 C4 120.8(3) . . ?
C1 N3 C11 118.4(3) . . ?
C4 N3 C11 120.3(3) . . ?
C4 N2 C3 119.3(3) . . ?
C7 C6 C5 120.6(3) . . ?
C7 C6 H6 119.7 . . ?
C5 C6 H6 119.7 . . ?
C10 C5 C6 118.9(3) . . ?
C10 C5 C4 123.5(3) . . ?
C6 C5 C4 117.3(3) . . ?
C12 C11 C16 121.3(3) . . ?
C12 C11 N3 119.5(3) . . ?
C16 C11 N3 119.0(3) . . ?
N2 C4 N3 124.5(3) . . ?
N2 C4 C5 117.7(3) . . ?
N3 C4 C5 117.7(3) . . ?
N1 C2 C1 112.5(3) . . ?
N1 C2 C3 110.9(3) . . ?
C1 C2 C3 111.2(3) . . ?
N1 C2 H2 107.3 . . ?
C1 C2 H2 107.3 . . ?
C3 C2 H2 107.3 . . ?
N2 C3 C24 110.3(3) . . ?
N2 C3 C2 111.8(2) . . ?
C24 C3 C2 108.9(3) . . ?
N2 C3 H3 108.6 . . ?
C24 C3 H3 108.6 . . ?
C2 C3 H3 108.6 . . ?
C5 C10 C9 120.6(3) . . ?
C5 C10 H10 119.7 . . ?
C9 C10 H10 119.7 . . ?
C29 C24 C25 118.4(3) . . ?
C29 C24 C3 120.4(3) . . ?
C25 C24 C3 121.0(3) . . ?
C8 C9 C10 120.1(3) . . ?
C8 C9 H9 119.9 . . ?
C10 C9 H9 119.9 . . ?
C23 C18 C19 117.7(4) . . ?
C23 C18 C17 123.7(3) . . ?
C19 C18 C17 118.5(4) . . ?
C18 C19 C20 120.5(4) . . ?
C18 C19 H19 119.7 . . ?
C20 C19 H19 119.7 . . ?
O2 C17 N1 121.8(3) . . ?
O2 C17 C18 121.9(4) . . ?
N1 C17 C18 116.2(3) . . ?
C26 C27 C28 122.4(4) . . ?
C26 C27 Cl2 119.1(4) . . ?
C28 C27 Cl2 118.4(4) . . ?
C11 C12 C13 120.0(4) . . ?
C11 C12 H12 120.0 . . ?
C13 C12 H12 120.0 . . ?
C11 C16 C15 118.4(4) . . ?
C11 C16 H16 120.8 . . ?
C15 C16 H16 120.8 . . ?
C6 C7 C8 120.1(3) . . ?
C6 C7 H7 120.0 . . ?
C8 C7 H7 120.0 . . ?
C14 C13 C12 118.2(4) . . ?
C14 C13 H13 120.9 . . ?
C12 C13 H13 120.9 . . ?
C15 C14 C13 122.3(4) . . ?
C15 C14 Cl1 118.5(4) . . ?
C13 C14 Cl1 119.2(4) . . ?
C20 C21 C22 120.8(4) . . ?
C20 C21 H21 119.6 . . ?
C22 C21 H21 119.6 . . ?
C21 C20 C19 120.0(4) . . ?
C21 C20 H20 120.0 . . ?
C19 C20 H20 120.0 . . ?
C24 C29 C28 122.2(4) . . ?
C24 C29 H29 118.9 . . ?
C28 C29 H29 118.9 . . ?
C29 C28 C27 117.9(4) . . ?
C29 C28 H28 121.0 . . ?
C27 C28 H28 121.0 . . ?
C14 C15 C16 119.6(4) . . ?
C14 C15 H15 120.2 . . ?
C16 C15 H15 120.2 . . ?
C27 C26 C25 119.2(4) . . ?
C27 C26 H26 120.4 . . ?
C25 C26 H26 120.4 . . ?
C24 C25 C26 119.8(4) . . ?
C24 C25 H25 120.1 . . ?
C26 C25 H25 120.1 . . ?
C9 C8 C7 119.7(3) . . ?
C9 C8 H8 120.2 . . ?
C7 C8 H8 120.2 . . ?
C18 C23 C22 121.6(4) . . ?
C18 C23 H23 119.2 . . ?
C22 C23 H23 119.2 . . ?
O1 C1 N3 121.8(3) . . ?
O1 C1 C2 123.7(3) . . ?
N3 C1 C2 114.5(3) . . ?
C21 C22 C23 119.2(4) . . ?
C21 C22 H22 120.4 . . ?
C23 C22 H22 120.4 . . ?
S1 O3 S1' 46.6(2) . . ?
S1' C31 H31A 124.0 . . ?
S1 C31 H31A 109.5 . . ?
S1' C31 H31B 72.1 . . ?
S1 C31 H31B 109.5 . . ?
H31A C31 H31B 109.5 . . ?
S1' C31 H31C 122.8 . . ?
S1 C31 H31C 109.5 . . ?
H31A C31 H31C 109.5 . . ?
H31B C31 H31C 109.5 . . ?
S1' C31 H31D 109.5 . . ?
S1 C31 H31D 127.0 . . ?
H31A C31 H31D 45.5 . . ?
H31B C31 H31D 64.0 . . ?
H31C C31 H31D 122.5 . . ?
S1' C31 H31E 109.5 . . ?
S1 C31 H31E 119.8 . . ?
H31A C31 H31E 125.5 . . ?
H31B C31 H31E 75.6 . . ?
H31D C31 H31E 109.5 . . ?
S1' C31 H31F 109.5 . . ?
S1 C31 H31F 72.3 . . ?
H31A C31 H31F 64.0 . . ?
H31B C31 H31F 173.2 . . ?
H31D C31 H31F 109.5 . . ?
H31E C31 H31F 109.5 . . ?
S1 C30 H30A 109.5 . . ?
S1' C30 H30A 127.1 . . ?
S1 C30 H30B 109.5 . . ?
S1' C30 H30B 120.8 . . ?
H30A C30 H30B 109.5 . . ?
S1 C30 H30C 109.5 . . ?
S1' C30 H30C 69.5 . . ?
H30A C30 H30C 109.5 . . ?
H30B C30 H30C 109.5 . . ?
S1 C30 H30D 132.6 . . ?
S1' C30 H30D 109.5 . . ?
H30A C30 H30D 53.5 . . ?
H30B C30 H30D 117.9 . . ?
H30C C30 H30D 56.6 . . ?
S1 C30 H30E 70.5 . . ?
S1' C30 H30E 109.5 . . ?
H30A C30 H30E 56.0 . . ?
H30B C30 H30E 86.7 . . ?
H30C C30 H30E 162.1 . . ?
H30D C30 H30E 109.5 . . ?
S1 C30 H30F 115.0 . . ?
S1' C30 H30F 109.5 . . ?
H30A C30 H30F 123.4 . . ?
H30C C30 H30F 87.0 . . ?
H30D C30 H30F 109.5 . . ?
H30E C30 H30F 109.5 . . ?
 
loop_
 _geom_torsion_atom_site_label_1
 _geom_torsion_atom_site_label_2
 _geom_torsion_atom_site_label_3
 _geom_torsion_atom_site_label_4
 _geom_torsion
 _geom_torsion_site_symmetry_1
 _geom_torsion_site_symmetry_2
 _geom_torsion_site_symmetry_3
 _geom_torsion_site_symmetry_4
 _geom_torsion_publ_flag
C7 C6 C5 C10 0.0(6) . . . . ?
C7 C6 C5 C4 173.8(3) . . . . ?
C1 N3 C11 C12 108.9(4) . . . . ?
C4 N3 C11 C12 -62.4(4) . . . . ?
C1 N3 C11 C16 -66.3(4) . . . . ?
C4 N3 C11 C16 122.4(3) . . . . ?
C3 N2 C4 N3 -2.3(5) . . . . ?
C3 N2 C4 C5 -177.9(3) . . . . ?
C1 N3 C4 N2 -11.5(5) . . . . ?
C11 N3 C4 N2 159.6(3) . . . . ?
C1 N3 C4 C5 164.2(3) . . . . ?
C11 N3 C4 C5 -24.7(5) . . . . ?
C10 C5 C4 N2 134.1(4) . . . . ?
C6 C5 C4 N2 -39.4(5) . . . . ?
C10 C5 C4 N3 -41.8(5) . . . . ?
C6 C5 C4 N3 144.7(3) . . . . ?
C17 N1 C2 C1 102.7(4) . . . . ?
C17 N1 C2 C3 -132.0(3) . . . . ?
C4 N2 C3 C24 153.7(3) . . . . ?
C4 N2 C3 C2 32.4(5) . . . . ?
N1 C2 C3 N2 -174.7(3) . . . . ?
C1 C2 C3 N2 -48.7(4) . . . . ?
N1 C2 C3 C24 63.2(4) . . . . ?
C1 C2 C3 C24 -170.8(3) . . . . ?
C6 C5 C10 C9 1.2(6) . . . . ?
C4 C5 C10 C9 -172.2(3) . . . . ?
N2 C3 C24 C29 -42.6(5) . . . . ?
C2 C3 C24 C29 80.5(4) . . . . ?
N2 C3 C24 C25 142.1(3) . . . . ?
C2 C3 C24 C25 -94.8(4) . . . . ?
C5 C10 C9 C8 -1.4(6) . . . . ?
C23 C18 C19 C20 -0.7(6) . . . . ?
C17 C18 C19 C20 176.7(4) . . . . ?
C2 N1 C17 O2 -9.7(5) . . . . ?
C2 N1 C17 C18 167.5(3) . . . . ?
C23 C18 C17 O2 150.5(4) . . . . ?
C19 C18 C17 O2 -26.8(5) . . . . ?
C23 C18 C17 N1 -26.7(5) . . . . ?
C19 C18 C17 N1 156.0(3) . . . . ?
C16 C11 C12 C13 -3.1(5) . . . . ?
N3 C11 C12 C13 -178.2(3) . . . . ?
C12 C11 C16 C15 4.2(5) . . . . ?
N3 C11 C16 C15 179.4(3) . . . . ?
C5 C6 C7 C8 -1.0(6) . . . . ?
C11 C12 C13 C14 2.0(5) . . . . ?
C12 C13 C14 C15 -2.3(6) . . . . ?
C12 C13 C14 Cl1 179.5(3) . . . . ?
C22 C21 C20 C19 1.8(7) . . . . ?
C18 C19 C20 C21 -1.3(7) . . . . ?
C25 C24 C29 C28 -0.6(6) . . . . ?
C3 C24 C29 C28 -176.1(3) . . . . ?
C24 C29 C28 C27 0.9(6) . . . . ?
C26 C27 C28 C29 -0.8(6) . . . . ?
Cl2 C27 C28 C29 179.4(3) . . . . ?
C13 C14 C15 C16 3.6(6) . . . . ?
Cl1 C14 C15 C16 -178.3(3) . . . . ?
C11 C16 C15 C14 -4.4(5) . . . . ?
C28 C27 C26 C25 0.4(7) . . . . ?
Cl2 C27 C26 C25 -179.8(3) . . . . ?
C29 C24 C25 C26 0.2(5) . . . . ?
C3 C24 C25 C26 175.6(4) . . . . ?
C27 C26 C25 C24 -0.1(6) . . . . ?
C10 C9 C8 C7 0.4(6) . . . . ?
C6 C7 C8 C9 0.9(6) . . . . ?
C19 C18 C23 C22 2.2(6) . . . . ?
C17 C18 C23 C22 -175.1(4) . . . . ?
C4 N3 C1 O1 174.7(4) . . . . ?
C11 N3 C1 O1 3.5(5) . . . . ?
C4 N3 C1 C2 -8.3(5) . . . . ?
C11 N3 C1 C2 -179.5(3) . . . . ?
N1 C2 C1 O1 -21.2(5) . . . . ?
C3 C2 C1 O1 -146.3(4) . . . . ?
N1 C2 C1 N3 161.8(3) . . . . ?
C3 C2 C1 N3 36.7(4) . . . . ?
C20 C21 C22 C23 -0.4(7) . . . . ?
C18 C23 C22 C21 -1.7(7) . . . . ?
C30 S1 O3 S1' 57.1(5) . . . . ?
C31 S1 O3 S1' -58.9(3) . . . . ?
C30 S1' O3 S1 -47.0(4) . . . . ?
C31 S1' O3 S1 59.8(3) . . . . ?
O3 S1' C31 S1 -54.0(3) . . . . ?
C30 S1' C31 S1 60.9(4) . . . . ?
O3 S1 C31 S1' 59.0(3) . . . . ?
C30 S1 C31 S1' -68.7(4) . . . . ?
O3 S1 C30 S1' -55.0(4) . . . . ?
C31 S1 C30 S1' 65.1(3) . . . . ?
O3 S1' C30 S1 46.0(3) . . . . ?
C31 S1' C30 S1 -66.6(3) . . . . ?
 
_diffrn_measured_fraction_theta_max    0.983
_diffrn_reflns_theta_full              25.00
_diffrn_measured_fraction_theta_full   0.983
_refine_diff_density_max    0.131
_refine_diff_density_min   -0.147
_refine_diff_density_rms    0.033
